# Supplementary material for: Direct observation of the double-layering quantized growth of mica-confined ionic liquids
Source: Royal Society of Chemistry journal article supplement (doi:10.1039/d1nr05437f), 2021-01-01
Supplement: d1nr05437f1.pdf [file d1nr05437f1.pdf]

## Supporting Information

### Direct observation of the double-layering quantized growth of mica-confined ionic liquids

Bingchen Wang, and Lei Li\*

Department of Chemical & Petroleum Engineering, Swanson School of Engineering,  
University of Pittsburgh, Pittsburgh, PA 15261, United States.

\*: Corresponding author. Email: lel55@pitt.edu.

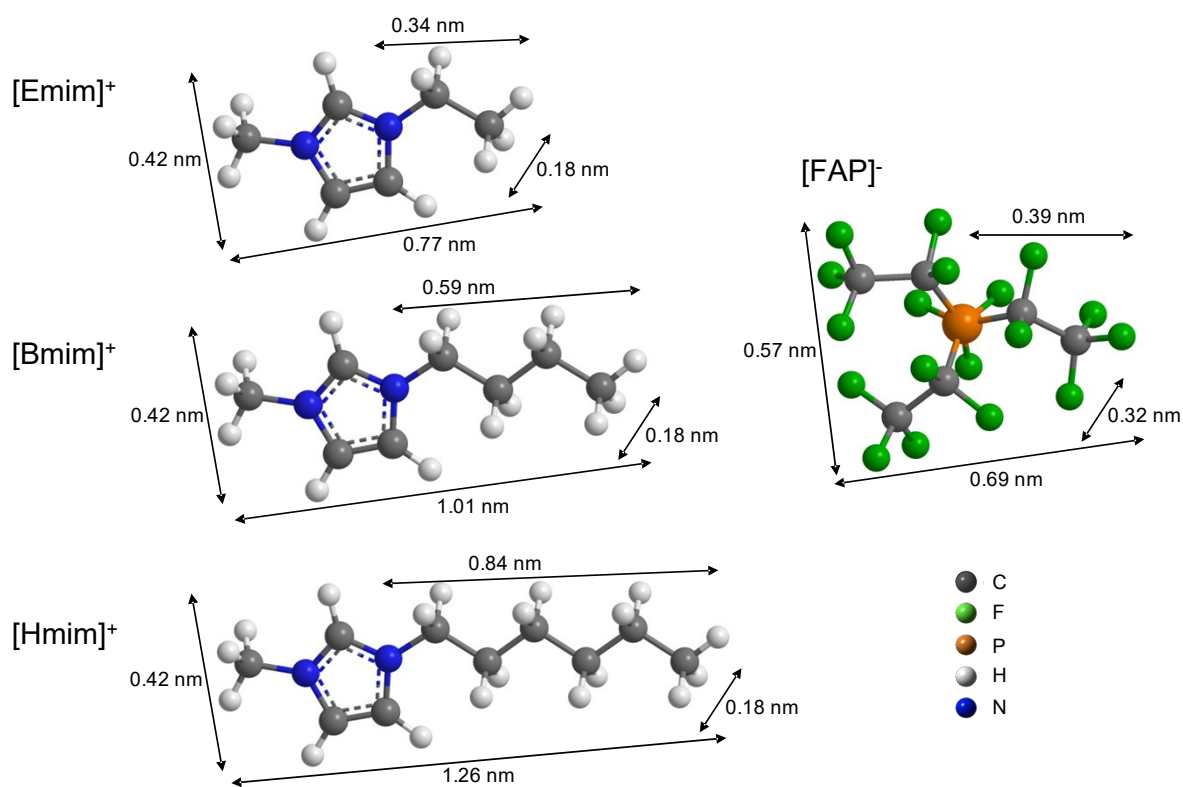

**Fig. S1** 3D chemical structures of the imidazolium cations with various alkyl chain length and the [FAP] anion. Energy minimization was performed using the MMFF94 force field.

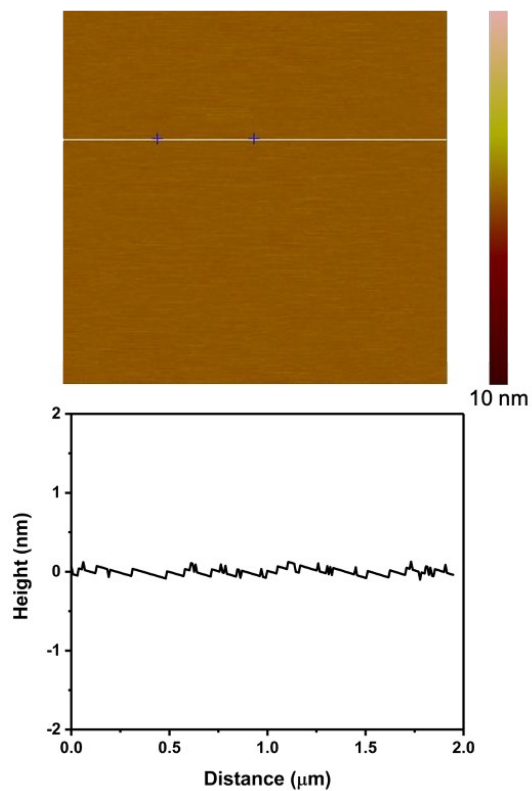

**Fig. S2** AFM image and the corresponding line profile of the fresh mica surface. The scan area is  $2\ \mu\text{m}$  by  $2\ \mu\text{m}$ , and the inset scale bar is for the z-direction.

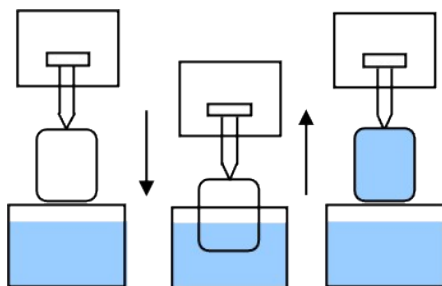

**Fig. S3** Fabrication of IL nanofilms on mica by dipcoating.

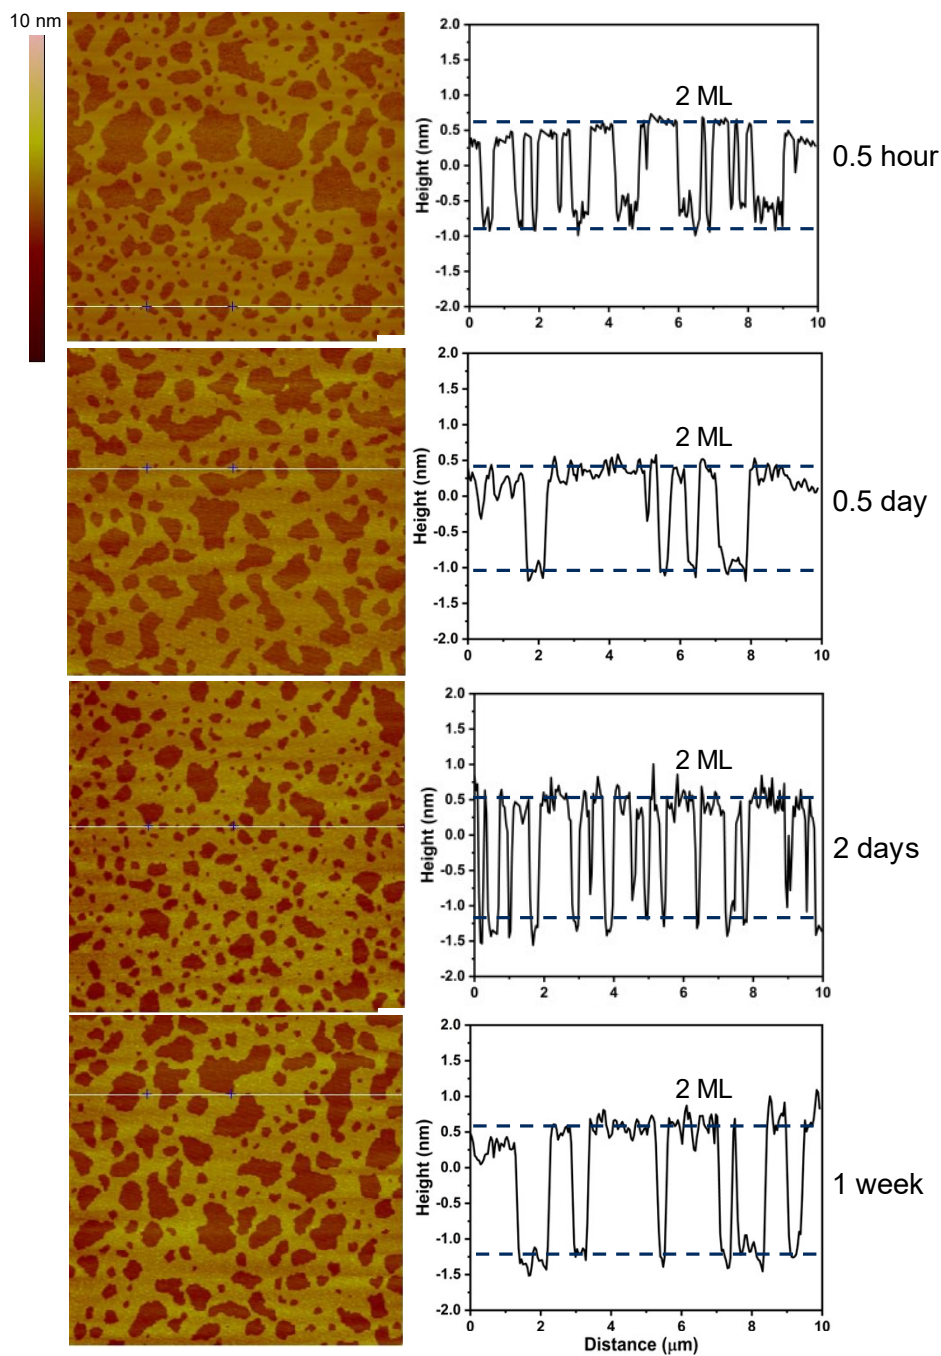

**Fig. S4** AFM images and their corresponding line profiles of time-dependent nanofilms of [Emim][FAP] fabricated from the concentration of 0.75 g/L. The ambient RH was 12-20% the whole time. The AFM scan areas are 10  $\mu\text{m}$  by 10  $\mu\text{m}$ , and the inset scale bar is for the z-direction. The x-axis and y-axis for the line profiles are the distance along the cut in the horizontal direction ( $\mu\text{m}$ ) and the height in the vertical direction (nm), respectively.

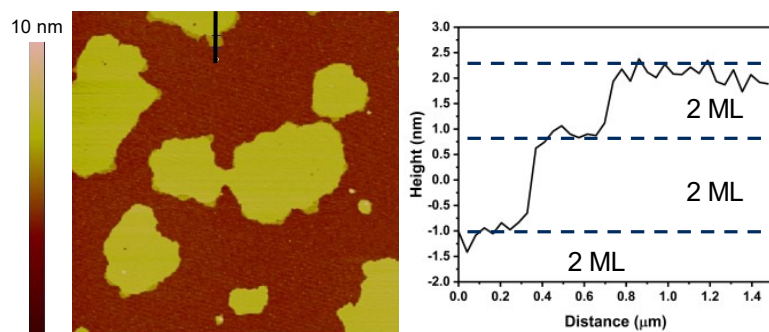

**Fig. S5** AFM image and the corresponding line profile of mica-confined [Hmim][FAP] fabricated from the concentration of 0.75 g/L. The scan was taken 1 week after the sample fabrication. The AFM scan areas are 10  $\mu\text{m}$  by 10  $\mu\text{m}$ , and the inset scale bar is for the z-direction.
